# Supplementary material
Source: PubMed Central journal article supplement (PMC4710092)
Supplement: NIHMS737798-supplement-Suppl_data.pdf [file NIHMS737798-supplement-Suppl_data.pdf]

# Supplement: Promoting a Culture of Safety as a Patient Safety Strategy

## Data Supplement: Search Strategies

All from January 2000-June 2012

### PubMed: Search Strategy:

“patient safety culture” OR “safety culture survey” OR “safety attitude questionnaire” OR “safety attitudes questionnaire” OR “safety attitude” OR “patient safety practice” OR (“Hospital Survey” AND “patient safety culture”) OR “Manchester Patient Safety Framework” OR (“Patient Safety Culture” AND survey) OR “patient safety climate” OR (“safety culture” OR “safety practice” OR “safety climate” OR “high reliability”)

AND

(rehabilitation OR snf OR “nursing home” OR “skilled nursing facility” OR hospital OR hospitals OR ICU OR intensive care unit OR “emergency room” OR attitude OR attitudes OR “assisted living” OR “long term care” OR resident OR residents OR “health center” OR healthcare OR “health care” OR patients OR patient OR intervention OR improvement OR scale OR “primary care”)) OR “hospital patient climate safety scale” OR “culture of safety” OR “culture of trust” OR (culture[ti] reliability[ti])

### CINAHL:

#### Search Strategy:

"patient safety culture" OR "safety attitude questionnaire" OR "patient safety practice" OR "hospital survey on patient safety" OR "manchester patient safety framework" OR "hospital patient climate safety scale" OR "culture of safety" OR "culture of reliability" OR "culture of trust"

OR

("safety culture" OR "safety practice" OR "safety climate" OR "high reliability")

AND

"skilled nursing facility" OR hospital OR hospitals OR ICU OR intensive care unit OR "emergency room" OR attitude OR attitudes OR "assisted living" OR "long term care" OR resident OR residents OR "health center" OR healthcare OR "health care" OR patients OR patient OR intervention OR improvement OR scale OR "primary care")

**Cochrane:**

Search Strategy:

"patient safety culture" OR "safety attitude questionnaire" OR "patient safety practice" OR "hospital survey on patient safety" OR "manchester patient safety framework" OR "hospital patient climate safety scale" OR "culture of safety" OR "culture of reliability" OR "culture of trust"

OR

( "safety culture" OR "safety practice" OR "safety climate" OR "high reliability"

AND

"skilled nursing facility" OR hospital OR hospitals OR ICU OR intensive care unit OR "emergency room" OR attitude OR attitudes OR "assisted living" OR "long term care" OR resident OR residents OR "health center" OR healthcare OR "health care" OR patients OR patient OR intervention OR improvement OR scale OR "primary care" )

**EMBASE**

Search:

no mapping or exploding of terms and unchecked "medline"

Search Strategy:

"patient safety culture" OR "safety attitude questionnaire" OR "patient safety practice" OR "hospital survey on patient safety" OR "manchester patient safety framework" OR "hospital patient climate safety scale" OR "culture of safety" OR "culture of reliability" OR "culture of trust"

OR

("safety culture" OR "safety practice" OR "safety climate" OR "high reliability"

AND

"skilled nursing facility" OR hospital OR hospitals OR ICU OR intensive care unit OR "emergency room" OR attitude OR attitudes OR "assisted living" OR "long term care" OR resident OR residents OR "health center" OR healthcare OR "health care" OR patients OR patient OR intervention OR improvement OR scale OR "primary care")

**PsycInfo Search:**

Search Strategy:

"patient safety culture" OR "safety attitude questionnaire" OR "patient safety practice" OR

"hospital survey on patient safety" OR "manchester patient safety framework" OR "hospital patient climate safety scale" OR "culture of safety" OR "culture of reliability" OR "culture of trust"

OR

("safety culture" OR "safety practice" OR "safety climate" OR "high reliability")

AND

"skilled nursing facility" OR hospital OR hospitals OR ICU OR intensive care unit OR "emergency room" OR attitude OR attitudes OR "assisted living" OR "long term care" OR resident OR residents OR "health center" OR healthcare OR "health care" OR patients OR patient OR intervention OR improvement OR scale OR "primary care")

## Data Supplement: Evidence Tables

**Table 1: Study characteristics and intervention.**

| Author,<br>year      | Study design           | Sample Size*<br>(Response Rate)                                                                                 | Measurement tool                                                  |
|----------------------|------------------------|-----------------------------------------------------------------------------------------------------------------|-------------------------------------------------------------------|
| Abtoss, 2011 (43)    | Pre-post               | <i>n</i> = 85 (90%)<br>1 PICU, 1 academic medical center                                                        | SAQ<br>*only 13 items<br>related to medication<br>error/reporting |
| Blegen, 2010 (36)    | Pre-post               | <i>n</i> = 368 (81%)<br>3 inpatient medical units, 3 hospitals                                                  | HSOPS                                                             |
| Frankel, 2008 (21)   | Pre-post               | <i>n</i> = 1, 256 (60%)<br>21 patient care areas, 2 teaching hospitals                                          | SAQ                                                               |
| Haynes, 2011 (44)    | Pre-post               | <i>n</i> = 257 (7 sites)<br>7 out of 8 international sites involved in the<br>WHO Safer Surgery Checklist study | SAQ<br>*6 items only                                              |
| McCulloch, 2009 (47) | Pre-post               | Not reported for SAQ<br>OR clinicians and staff at UK teaching<br>hospital                                      | SAQ                                                               |
| Muething, 2012 (25)  | Time series            | <i>n</i> = 3752 (31%) at last measurement period,<br>1 large, urban pediatric academic medical<br>center        | HSOPS                                                             |
| O'Leary, 2010 (27)   | Concurrent<br>control  | <i>n</i> = 147 (92%)<br>2 general medicine units, 1 tertiary care<br>teaching hospital                          | SAQ                                                               |
| O'Leary, 2011 (28)   |                        | <i>n</i> = 49 (84%)<br>1 hospitalist unit, 1 tertiary care teaching<br>hospital                                 |                                                                   |
| Pettker, 2009 (29)   | Pre-post               | <i>n</i> = 183 (72%)<br>1 obstetrical service, 1 larger tertiary-level<br>academic medical center               | SAQ                                                               |
| Pettker, 2011 (26)   |                        |                                                                                                                 |                                                                   |
| Pronovost, 2005 (41) | Quasi-stepped<br>wedge | WICU <i>n</i> = 64 (86%)<br>SICU <i>n</i> = 23 (84%)<br>2 ICUs, 1 academic tertiary care hospital               | SCS                                                               |
| Riley, 2011 (45)     | Cluster RCT            | <i>n</i> = 134 (not reported)<br>3 labor and delivery units, 3 community<br>hospitals                           | SAQ                                                               |
| Saladino, 2012 (39)  | Pre-post               | <i>n</i> = 55 (69%)<br>1 medical-surgical critical care unit in<br>medium sized community hospital              | SAQ                                                               |
| Sexton, 2011 (46)    | Pre-post               | <i>n</i> = 3,533 (73%)<br>71 ICUs nested in 71 hospitals                                                        | SAQ                                                               |
| Simpson, 2011 (38)   | Pre-post               | <i>n</i> = 15 hospitals<br>Perinatal care units                                                                 | SAQ                                                               |

| <b>Author,<br/>year</b> | <b>Study design</b> | <b>Sample Size*<br/>(Response Rate)</b>                                                                 | <b>Measurement tool</b> |
|-------------------------|---------------------|---------------------------------------------------------------------------------------------------------|-------------------------|
| Thomas, 2005 (22)       | Cluster RCT         | <i>n</i> = 1,000 (55%)<br>*report results for 598 nurses<br>23 units, 1 tertiary care teaching hospital | SAQ                     |
| Tiessen, 2008 (37)      | Pre-post            | <i>n</i> = 112 (35%)<br>1 acute care, rural community hospital                                          | PSCHO                   |
| Timmel, 2010 (40)       | Pre-post            | <i>n</i> = 28 (100%)<br>1 surgical unit, 1 academic tertiary care hospital                              | SAQ                     |
| Vigorito, 2011 (42)     | Concurrent control  | <i>N</i> = 918 (85%)<br>23 ICUs in 11 hospitals                                                         | SAQ                     |
| Weaver, 2010 (48)       | Pre-post            | <i>n</i> = 28 (51%)<br>2 community hospitals, 3 surgical teams in each hospital                         | HSOPS<br>*4 dimensions  |
| Wolf, 2010 (49)         | Pre-post            | <i>n</i> = 44 (not reported); 4863 debriefing forms<br>OR clinicians and staff in academic referral VA  | SAQ                     |

\*Post sample size reported, SAQ = Safety Attitudes Questionnaire, HSOPS = Hospital Survey on Patient Safety Culture, SCS = Safety climate scale, PSCHO = Patient Safety Climate in Healthcare Organizations, CUSP = Comprehensive Unit-Based Safety Program, CPOE = Computerized Physician Order Entry

**Table 2: Intervention types**

| Author, year         | Study design        | Intervention                                                                                                                                                                      |       |       |      |
|----------------------|---------------------|-----------------------------------------------------------------------------------------------------------------------------------------------------------------------------------|-------|-------|------|
|                      |                     | Description                                                                                                                                                                       | TT/CT | EW/IR | CUSP |
| Abstoss, 2011 (43)   | Pre-post            | Multi-component: Feedback, QI education, CPOE, medication management, report form                                                                                                 | Yes   |       |      |
| Blegen, 2010 (36)    | Pre-post            | Multi-component: Triad for Optimal Patient Safety (TOPS) including team training, unit based safety team, patient engagement in daily goals                                       | Yes   |       |      |
| Frankel, 2008 (21)   | Pre-post            | Executive walk rounds                                                                                                                                                             |       | Yes   |      |
| Haynes, 2011 (44)    | Time-series         | Multi-component: 15 prevention practices, 9 detection practices, 5 corrective practices                                                                                           | Yes   |       |      |
| McCulloch, 2009 (47) | Pre-post            | Crew Resource Management course followed by 3 months of coaching 2 times per week                                                                                                 | Yes   |       |      |
| Muething, 2012 (25)  | Time-series         | Multi-component: Error prevention training coaching, family engagement, restructured patient safety governance, lessons learned program, cause analysis program, executive rounds | Yes   | Yes   |      |
| O'Leary, 2010 (27)   | Concurrent control  | Structured interdisciplinary rounds                                                                                                                                               |       | Yes   |      |
| O'Leary, 2011 (28)   |                     |                                                                                                                                                                                   |       |       |      |
| Pettker, 2009 (29)   | Pre-post            | Multi-component: protocol standardization, creation of patient safety RN position and patient safety committee, team skills training                                              | Yes   |       |      |
| Pettker, 2011 (26)   |                     |                                                                                                                                                                                   |       |       |      |
| Pronovost, 2005 (41) | Quasi-stepped wedge | Comprehensive Unit-Based Safety Program                                                                                                                                           |       |       | Yes  |
| Riley, 2011 (45)     | Cluster RCT         | TeamSTEPPS: Didactic training with in-situ simulation versus didactic only                                                                                                        | Yes   |       |      |
| Saladino, 2012 (39)  | Pre-post            | Comprehensive Unit-Based Safety Program                                                                                                                                           |       |       | Yes  |
| Sexton, 2011 (46)    | Pre-post            | Comprehensive Unit-Based Safety Program                                                                                                                                           |       |       | Yes  |

|                     |                    |                                                                                                                                                                                                 |     |
|---------------------|--------------------|-------------------------------------------------------------------------------------------------------------------------------------------------------------------------------------------------|-----|
| Simpson, 2011 (38)  | Pre-post           | Comprehensive Unit-Based Safety Program within a collaborative                                                                                                                                  | Yes |
| Thomas, 2005 (22)   | Cluster RCT        | Executive walk rounds                                                                                                                                                                           | Yes |
| Tiessen, 2008 (37)  | Pre-post           | Multi-component: measure culture, patient safety education, share stories, weekly executive walk rounds, prioritize improvement efforts, identify staff safety concerns, implement improvements | Yes |
| Timmel, 2010 (40)   | Pre-post           | Comprehensive Unit-Based Safety Program                                                                                                                                                         | Yes |
| Vigorito, 2011 (42) | Concurrent Control | Comprehensive Unit-Based Safety Program within a collaborative; analyses focus on use of safety culture action plan                                                                             | Yes |
| Weaver, 2010 (48)   | Pre-post           | Team training                                                                                                                                                                                   | Yes |
| Wolf, 2010 (49)     | Pre-post           | Team training, debriefing/checklists, long-term monitoring                                                                                                                                      | Yes |

\*tt= team training, team communication intervention, or team communication tool (e.g., briefing checklist), EW = executive walk rounds or interdisciplinary rounding intervention, CUSP = comprehensive unit-based safety program intervention

**Table 3: Reported outcomes for studies evaluating interventions to promote a culture of safety.**

| <b>Author, year</b>  | <b>Study design</b> | <b>Safety Culture Survey</b>                                                                                                                                                                   | <b>Care Processes</b>                                                                                      | <b>Patient Outcomes</b>                                                                                                                  | <b>Clinician Outcomes</b> |
|----------------------|---------------------|------------------------------------------------------------------------------------------------------------------------------------------------------------------------------------------------|------------------------------------------------------------------------------------------------------------|------------------------------------------------------------------------------------------------------------------------------------------|---------------------------|
| Abstoss, 2011 (43)   | Pre-post            | Safety climate <sup>+</sup><br>Teamwork climate <sup>+*</sup>                                                                                                                                  |                                                                                                            | Reported errors resulting in harm <sup>+*</sup>                                                                                          |                           |
| Blegen, 2010 (36)    | Pre-post            | Significant improvement in 5 of 10 dimensions <sup>+*</sup>                                                                                                                                    |                                                                                                            |                                                                                                                                          |                           |
| Frankel, 2008 (21)   | Pre-post            | Significant improvement in safety climate in 1 hospital (pre = 65%, post = 77%) <sup>+*</sup> , improvement trend in second hospital, but not significant (pre = 46%, post = 56%) <sup>+</sup> |                                                                                                            |                                                                                                                                          |                           |
| Haynes, 2011 (44)    | Time-series         | 1 of 3 targeted dimensions improved significantly (non-punitive response to error) <sup>+*</sup>                                                                                               |                                                                                                            | Significant reduction (24%) in code rates only for 12 hospitals submitting data 12months following collaborative <sup>+*</sup>           |                           |
| McCulloch, 2009 (47) | Pre-post            | Safety climate increased significantly, other dimensions did not as hypothesized <sup>+*</sup>                                                                                                 | Quality of observed teamwork behaviors did not improve significantly (pre = 37, post = 38.7) <sup>+*</sup> |                                                                                                                                          |                           |
| Muething, 2012 (25)  | Time-series         | 10 of 14 dimensions significantly improved from 2007-2009 <sup>+*</sup>                                                                                                                        |                                                                                                            | Serious safety events decreased from 0.9 pre to .3 post. <sup>-*</sup><br>Days between safety events 19.4 pre to 55.2 post <sup>-*</sup> |                           |



|                      |                     |                                                                                                        |                                                                                                               |                                                                                                     |                                                                                          |
|----------------------|---------------------|--------------------------------------------------------------------------------------------------------|---------------------------------------------------------------------------------------------------------------|-----------------------------------------------------------------------------------------------------|------------------------------------------------------------------------------------------|
| O'Leary, 2010 (27)   | Concurrent control  | Teamwork climate and safety climate significantly increased <sup>+,*</sup>                             | Perceived quality of communication and collaboration significantly higher in intervention group (80% vs. 54%) | Adjusted LOS was 0.19 days longer for the intervention unit vs. control n.s. ( $p = 0.17$ )         | Adjusted cost was \$24.05 less for the intervention unit vs. control n.s. ( $p = 0.94$ ) |
| O'Leary, 2011 (28)   |                     |                                                                                                        |                                                                                                               |                                                                                                     |                                                                                          |
| Pettker, 2009 (29)   | Pre-post            | Significant improvements in 4 domains <sup>+,*</sup> , significant reduction in 1 domain <sup>-*</sup> |                                                                                                               | Significant improvement in Adverse Outcomes Index (pre= 3.3%, post =1.6%) <sup>+,*</sup>            |                                                                                          |
| Pettker, 2011 (26)   |                     |                                                                                                        |                                                                                                               |                                                                                                     |                                                                                          |
| Pronovost, 2005 (41) | Quasi-stepped wedge | Significant improvement in 8 of 10 questions <sup>+,*</sup>                                            |                                                                                                               | Significant improvement in length of stay (pre = 2d, 3d, post = 1d, 2.3d) <sup>+,*</sup>            | Nurse turnover decreased (pre= 9%, post = 2%) <sup>+</sup>                               |
| Riley, 2011 (45)     | Cluster RCT         | No significant change                                                                                  |                                                                                                               | Significant reduction in perinatal patient harm (WAOS score pre = 1.15, post = 0.72) <sup>+,*</sup> |                                                                                          |
| Saladino, 2012 (39)  | Pre-post            | Scores for all 7 domains reported, no significant change in any                                        | Staff concerns resolved (77 issues identified through staff survey and rounds, 44 resolved)                   |                                                                                                     |                                                                                          |
| Sexton, 2011 (46)    | Pre-post            | Significant improvement in safety climate (pre= 42.5%, post = 52.2%) <sup>+,*</sup>                    |                                                                                                               |                                                                                                     |                                                                                          |

|                     |                    |                                                                                                                                           |                                                                                                                                                                                                                                                                                             |                                                                                                                             |
|---------------------|--------------------|-------------------------------------------------------------------------------------------------------------------------------------------|---------------------------------------------------------------------------------------------------------------------------------------------------------------------------------------------------------------------------------------------------------------------------------------------|-----------------------------------------------------------------------------------------------------------------------------|
| Simpson, 2011 (38)  | Pre-post           | 5 of 7 domains increased <sup>+</sup><br>(No statistical tests reported)                                                                  | Labor inductions reduced 62% <sup>+,*</sup> , elective C-sections reduced 68% <sup>+,*</sup> , scores on induction care improved 114% <sup>+,*</sup> , perfect scores on failure to rescue tool improved 81% <sup>+,*</sup> , scores on second stage labor care improved 98% <sup>+,*</sup> | Apgar scores < 7 reduced 51%, but not significant <sup>+</sup>                                                              |
| Thomas, 2005 (22)   | Cluster RCT        | Significant improvement in safety climate (pre= 52.5%, post = 72.9%) <sup>+,*</sup>                                                       |                                                                                                                                                                                                                                                                                             |                                                                                                                             |
| Tiessen, 2008 (37)  | Pre-post           | Significant improvement on only 2 of 30 items <sup>+,*</sup> , significant decrease on one item <sup>-*</sup> (no domain scores reported) |                                                                                                                                                                                                                                                                                             |                                                                                                                             |
| Timmel, 2010 (40)   | Pre-post           | Significant improvement on 6 of 7 domains <sup>+,*</sup>                                                                                  |                                                                                                                                                                                                                                                                                             | Nurse turnover decreased (pre= 25%, post = 0%) (no statistical test reported)                                               |
| Vigorito, 2011 (42) | Concurrent Control | Greater improvements in 6 of 7 domains in intervention group, but not statistically significant <sup>+</sup>                              |                                                                                                                                                                                                                                                                                             | Intervention group achieved greater reduction in CLABSI rates and VAP rates, but not statistically significant <sup>+</sup> |
| Weaver, 2010 (48)   | Pre-post           | No significant difference between groups over time                                                                                        | Observational measures of behavior in the OR (e.g., communication, teamwork) <sup>+,*</sup>                                                                                                                                                                                                 |                                                                                                                             |

---

|                 |          |                                                                             |                                                                        |
|-----------------|----------|-----------------------------------------------------------------------------|------------------------------------------------------------------------|
| Wolf, 2010 (49) | Pre-post | Statistically significant improvements in 2 out of 6 domains <sup>+</sup> * | Decreased care delays <sup>+</sup> *<br>Hand-off issues <sup>+</sup> * |
|-----------------|----------|-----------------------------------------------------------------------------|------------------------------------------------------------------------|

---

+ = Improved, but not statistically significant, +\* = Improved and statistically significant,  $p < .05$ , -\* = decreased and statistically significant,  $p < .05$

**Figure. Study flow diagram.**

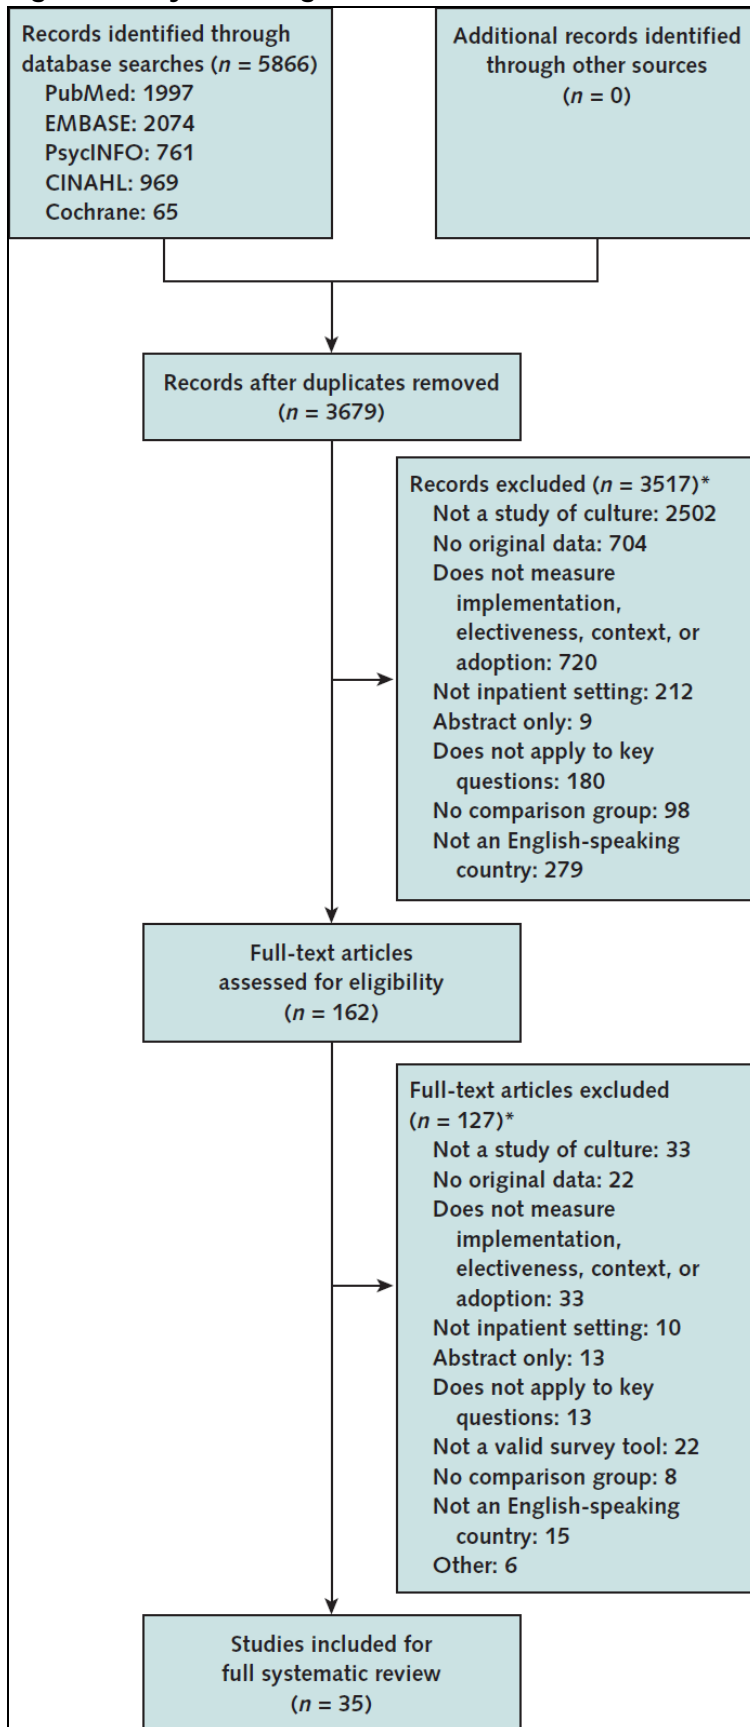

\* The number of reasons for exclusion is higher than the number of exclusions because both reviewers did not have to cite the same reason for excluding the record or article.
